# Supplementary material
Source: MDPI journal article supplement (https://www.mdpi.com/2227-9040/12/5/76)
Supplement: s1 [file s1]

## Supplementary Material

# Influence of Silsesquioxane-Containing Ultra-Thin Polymer Films on Metal Oxide Gas Sensor Performance for the Tunable Detection of Biomarkers

Oleg Lupan <sup>1,2,3,4,\*</sup>, Mihai Brinza <sup>3</sup>, Julia Piehl <sup>1</sup>, Nicolai Ababii <sup>3</sup>, Nicolae Magariu <sup>3</sup>, Lukas Zimoch <sup>2</sup>, Thomas Strunskus <sup>1</sup>, Thierry Pauporte <sup>4</sup>, Rainer Adelung <sup>2</sup>, Franz Faupel <sup>1</sup> and Stefan Schröder <sup>1,\*</sup>

<sup>1</sup> Department of Materials Science, Chair for Multicomponent Materials, Kiel University, Kaiserstraße 2, D-24143 Kiel, Germany; julp@tf.uni-kiel.de (J.P.); ts@tf.uni-kiel.de (T.S.); ff@tf.uni-kiel.de (F.F.)

<sup>2</sup> Functional Nanomaterials, Faculty of Engineering, Institute for Materials Science, Kiel University, Kaiserstraße 2, D-24143 Kiel, Germany; luzi@tf.uni-kiel.de (L.Z.); ra@tf.uni-kiel.de (R.A.)

<sup>3</sup> Center for Nanotechnology and Nanosensors, Department of Microelectronics and Biomedical Engineering, Technical University of Moldova, 168 Stefan cel Mare Av., MD-2004 Chisinau, Moldova; mihai.brinza@mib.utm.md (M.B.); nicolai.ababii@mib.utm.md (N.A.); nicolae.magariu@mib.utm.md (N.M.)

<sup>4</sup> Institut de Recherche de Chimie Paris-IRCP, Chimie ParisTech, PSL Université, rue Pierre et Marie Curie 11, 75231 Paris, CEDEX 05, France; thierry.pauporte@chimieparistech.psl.eu

\* Correspondence: oleg.lupan@mib.utm.md (O.L.); ssch@tf.uni-kiel.de (S.S.)

## Contents

**Table S1.** Gas response data in % for Figure 5a.

**Table S2.** Gas response data in % for Figure 5b.

**Figure S1.** (a) Comparison of hybrid sensor responses at different relative humidity levels; (b) dynamic response of the cage layer hybrid sensor to H<sub>2</sub> molecules at a 350 °C operating temperature and 50% relative humidity.

**Figure S2.** Long-term stability of one of the sensors applied in this study.

**Table S1.** Gas response data in % for Figure 5a.

| O.T.   | Hydrogen | 2-Propanol | n-Butanol | Acetone | Ammonia | Carbon dioxide | Methane |
|--------|----------|------------|-----------|---------|---------|----------------|---------|
| 250 °C | 69.04    | 0.1        | 0.1       | 0.1     | 0.1     | 0.1            | 0.1     |
| 300 °C | 213.44   | 7.53       | 8.57      | 3.23    | 0.1     | 0.1            | 0.1     |
| 350 °C | 256.01   | 99.76      | 63.62     | 32.12   | 0.1     | 15.17          | 0.1     |

**Table S2.** Gas response data in % for Figure 5b.

| O.T.   | Hydrogen | 2-Propanol | n-Butanol | Acetone | Ammonia | Carbon dioxide | Methane |
|--------|----------|------------|-----------|---------|---------|----------------|---------|
| 250 °C | 15.14    | 0.1        | 0.1       | 0.1     | 0.1     | 0.1            | 0.1     |
| 300 °C | 182.06   | 16.07      | 7.26      | 0.1     | 0.1     | 0.1            | 0.1     |
| 350 °C | 709.07   | 141.43     | 144.35    | 45.65   | 2.17    | 13.51          | 0.1     |

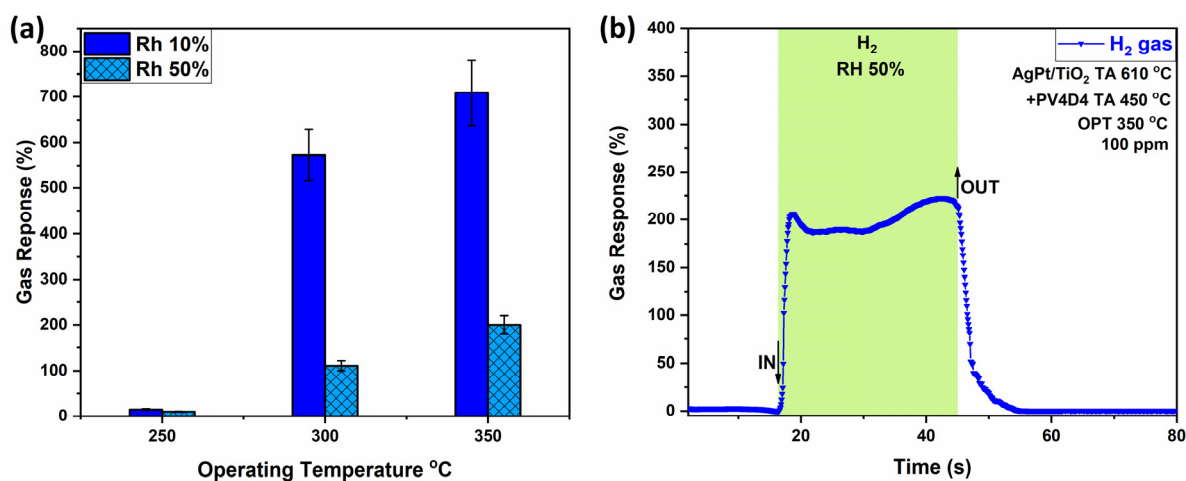**Figure S1.** (a) Comparison of hybrid sensor responses at different relative humidity levels; (b) dynamic response of the cage layer hybrid sensor to H<sub>2</sub> molecules at a 350 °C operating temperature and 50% relative humidity.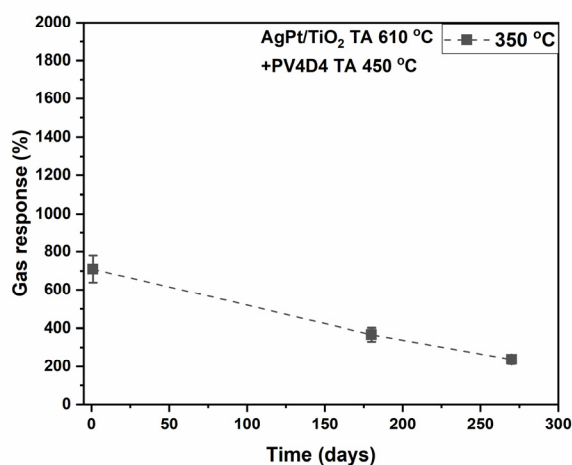**Figure S2.** Long-term stability of one of the sensors applied in this study.
